# Supplementary material for: Wnt/Axin1/β-Catenin Signaling Regulates Asymmetric Nodal Activation, Elaboration, and Concordance of CNS Asymmetries
Source: PubMed Central journal article supplement (PMC1940036; doi:10.1016/j.neuron.2007.07.007), 2007-08-02
Supplement: mmc1.pdf [file mmc1.pdf]

## Supplemental Data

### **Wnt/Axin1/ $\beta$ -Catenin Signaling Regulates Asymmetric Nodal Activation, Elaboration, and Concordance of CNS Asymmetries**

Matthias Carl, Isaac H. Bianco, Baubak Bajoghli, Narges Aghaallaei, Thomas Czerny, and Stephen W. Wilson

#### Supplemental results

#### **Early activation of Wnt/ $\beta$ -catenin signalling disrupts asymmetric Nodal pathway gene expression**

To address if modulation of Wnt signalling can affect asymmetry we activated (exogenous *wnt8b*, *activated- $\beta$ -catenin* or *tcf3a* morpholinos) the pathway early in development. A well-described consequence of such manipulations is to disturb AP patterning of the CNS with Wnt signalling posteriorising the rostral brain (Wilson and Houart, 2004; Yamaguchi, 2001). To minimise this effect, we used low amounts of reagents so that we could assess asymmetric structures in embryos in which regionalisation of the brain is relatively normal.

Overexpression of *wnt8b* resulted in concordant bilateral Nodal pathway gene expression in both the LPM and the epithalamus (Figure S1A-B and data not shown). At later stages, embryos showed heterotaxic laterality defects in viscera, heart and brain (Figure S1C-F).

Both the expression of *activated- $\beta$ -catenin* and interference with *tcf3a* function induced AP patterning phenotypes similar to those obtained by *wnt8b* overexpression but far fewer embryos exhibited laterality defects (Figure S1A''-F''). Some *tcf3a* morphants showed reversed expression of the habenula marker *lov*, but most other markers were relatively unaffected (Figure S1D'').

#### **Several Wnt ligands and Wnt pathway genes are expressed in the epithalamus**

At least five Wnt ligands are expressed in the epithalamus by the 10 to 14 somite stage (Figure S3) and *wnt16* is expressed in this region soon afterwards (Thisse and Thisse, 2004). Using *flh* expression to define the presumptive pineal complex (Concha et al., 2003; Masai et al., 1997), we find that *wnt1*, *wnt10b* (Lekven et al., 2003; Thisse and Thisse, 2005) and *wnt3a* are expressed caudal and lateral to the presumptive pineal complex (Figure S3A-D), a *wnt7b* homologue (Experimental Procedures) and *wnt8b* are expressed ventral to this domain (Figure S3E-H) and *wnt2* is expressed ubiquitously (Thisse and Thisse, 2004). In addition, several genes that function downstream in the Wnt/ $\beta$ -catenin pathway are expressed in and/or around the epithalamus at these

stages (Figure S3 and e.g. (Dorsky et al., 2003; Dorsky et al., 1999; Kim et al., 2000; Nasevicius et al., 2000; Veien et al., 2005; Young et al., 2002).

Wnt genes continue to be expressed in the epithalamus after brain asymmetries become morphologically evident with *wnt1* and *wnt7b* expression detectable close to the epiphysis and *wnt3a* and more strongly *wnt8b* expression in the habenulae (Figure S3K-R). At the level of transcription, we did not observe any obvious asymmetries in expression of Wnt pathway components in the brain.

*dkk*, *axin1* and *axin2* are also expressed in and around the epithalamus at somite stages (Figure S3I,J,S,U) and both *axin* genes continue to be expressed in the epithalamus throughout the first few days of development (Figure S3T-V).

## Figure legends for supplementary data:

### Figure S1. Manipulations that disrupt early Wnt pathway activity result in loss of asymmetry of Nodal pathway gene expression in the LPM and brain and heterotaxia phenotypes

(A-F) The panels show wild-type expression of genes as indicated on the left. (A'-F') To illustrate the effect of manipulation of Wnt signalling, the panels show the expression of the same genes in *wnt8b* injected embryos. (A,A') Frontal views of the epithalamus and (B,B') dorsal views of 24s stage embryos. Red dotted line indicates the midline, black arrows point at *pitx2* expression in the epithalamus (et) and white arrows at *pitx2* expression in the lateral plate mesoderm (LPM).

(C,C',D,D') Dorsal views of the epithalamus at (C,C') 2 days and (D,D') 4 days of development. (E,E') Dorsal and (F,F') frontal views of 2 days old embryos. The yellow dotted line outlines (E,E') the embryo and (F,F') the heart.

(A''-F'') The graphs illustrate the percentage of embryos with wild-type (WT) left, reversed (rev) right, bilateral (bil), medial (med) or not visible (nv) gene expression upon activation of the Wnt signalling pathway.

lhab, left habenula; pp, parapineal; rhab, right habenula.

### Figure S2. Left and right habenular axon terminals are segregated along the DV axis of the target IPN nucleus

Dorsal view of the interpeduncular nucleus (IPN) in a 7 days old medaka embryo. DiI/DiD labelling of axonal projections from the habenulae shows the dorso-ventral segregation within the IPN similar to zebrafish (compare with e. g. Figure 4I). dIPN, dorsal and vIPN, ventral IPN.

### Figure S3. Expression of various Wnt pathway genes in and around the epithalamus.

(A-K,M,O,Q,S-V) Lateral views and (L,N,P,R,T',V') dorsal views focused on the diencephalic epithalamus (et; except S,U). All developmental stages are indicated on the left of each horizontal row of panels and the marker genes used on the top of each vertical row. (A-J) *floating head* (*flh*) expression in the epithalamus (in red) has been used as a landmark. (I,J) *dickkopf* (*dkk*) is expressed in the epithalamic area at mid-somitogenesis stages. Its expression fades shortly later (data not shown). (S,T,T') In zebrafish and *Xenopus* *axin1* is initially expressed ubiquitously up to tailbud stages but becomes subsequently confined to the fore- and midbrain region (Hedgepeth et al., 1999; Van de Water et al., 2001). (T') Similar to *Xenopus* we find increased *axin1* expression in the habenula from three days of development onward, but more pronounced on the left side (red dotted circle). (U,V,V') *axin2* is expressed in the dorsal neural tube and CNS including the epithalamus

also at later stages. For further details see supplementary results. ey, eye; hab, habenula (green circle); tc, telencephalon; tec, tectum.

**Figure S4: Mosaic overactivation of Wnt signalling can induce *lft1***

(A,B) Lateral views of the presumptive tail region of tailbud stage embryos, which have been injected with GFP:HS:lef-VP16 DNA (see also Bajoghli et al., 2007), heat shock treated at late gastrulation and 2 hrs later analysed for *lft1* and GFP expression. Ectopic *lft1* expression can be seen in the vicinity of GFP expressing cells.



## References

- Bajoghli, B., Aghaallaei, N., Soroldoni, D., and Czerny, T. (2007). The roles of Groucho/Tle in left-right asymmetry and Kupffer's vesicle organogenesis. *Dev Biol* 303, 347-361.
- Concha, M. L., Russell, C., Regan, J. C., Tawk, M., Sidi, S., Gilmour, D. T., Kapsimali, M., Sumoy, L., Goldstone, K., Amaya, E., *et al.* (2003). Local tissue interactions across the dorsal midline of the forebrain establish CNS laterality. *Neuron* 39, 423-438.
- Dorsky, R. I., Itoh, M., Moon, R. T., and Chitnis, A. (2003). Two *tcf3* genes cooperate to pattern the zebrafish brain. *Development* 130, 1937-1947.
- Dorsky, R. I., Snyder, A., Cretekos, C. J., Grunwald, D. J., Geisler, R., Haffter, P., Moon, R. T., and Raible, D. W. (1999). Maternal and embryonic expression of zebrafish *lef1*. *MOD* 86, 147-150.
- Hedgepeth, C. M., Dewardoff, M. A., and Klein, P. S. (1999). *Xenopus axin* interacts with glycogen synthase kinase-3 beta and is expressed in the anterior midbrain. *MOD* 80, 147-151.
- Kim, C. H., Oda, T., Itoh, M., Jiang, D., Artinger, K. B., Chandrasekharappa, S. C., Driever, W., and Chitnis, A. B. (2000). Repressor activity of *Headless/Tcf3* is essential for vertebrate head formation. *Nature* 407, 913-916.
- Lekven, A. C., Buckles, G. R., Kostakis, N., and Moon, R. T. (2003). *Wnt1* and *wnt10b* function redundantly at the zebrafish midbrain-hindbrain boundary. *Dev Biol* 254, 172-187.
- Masai, I., Heisenberg, C.-P., Barth, K. A., Macdonald, R., Adamek, S., and Wilson, S. W. (1997). *floating head* and *masterblind* regulate neuronal patterning in the roof of the forebrain. *Neuron* 18, 43-57.
- Nasevicius, A., Hyatt, T. M., Hermanson, S. B., and Ekker, S. C. (2000). Sequence, expression, and location of zebrafish *frizzled 10*. *MOD* 92, 311-314.
- Thisse, B., and Thisse, C. (2004). Fast Release Clones: A High Throughput Expression Analysis. ZFIN Direct Data Submission.
- Thisse, C., and Thisse, B. (2005). High Throughput Expression Analysis of ZF-Models Consortium Clones. ZFIN Direct Data Submission.
- Van de Water, S., Van de Wetering, M., Joore, J., Esseling, J., Blink, R., Clevers, H., and Zivkovic, D. (2001). Ectopic Wnt signal determines the eyeless phenotype of zebrafish *masterblind* mutant. *Development* 128.
- Veien, E. S., Grierson, M. J., Saund, R. S., and Dorsky, R. I. (2005). Expression pattern of zebrafish *tcf7* suggests unexplored domains of Wnt/beta-catenin activity. *Dev Dyn* 233, 233-239.
- Wilson, S. W., and Houart, C. (2004). Early steps in the development of the forebrain. *Developmental Cell* 6, 167-181.
- Yamaguchi, T. P. (2001). Heads or tails: Wnts and anterior-posterior patterning. *Curr Biol* 11, R713-724.
- Young, R., Reyes, A., and Allende, M. (2002). Expression and splice variant analysis of the zebrafish *tcf4* transcription factor. *MOD* 117, 269-273.

Table S1: Analysis of asymmetry in *masterblind* (*axin1*) mutant embryos

| <u>marker</u>              | <u>wt</u> | <u>reversed</u> | <u>bilateral</u> | <u>not visible</u> | <u>n</u>  |
|----------------------------|-----------|-----------------|------------------|--------------------|-----------|
| <i>lft1</i> -brain         | 32 (100)  | 0 (0)           | 68 (0)           | 0 (0)              | 82 (62)   |
| <i>pitx2</i> -brain        | 29 (99)   | 1 (0)           | 70 (1)           | 0 (0)              | 105 (94)  |
| <i>cyc</i> -brain          | 23 (93)   | 3 (1)           | 68 (0)           | 6 (6)              | 31 (88)   |
| <i>otx5</i> -pp            | 38 (100)  | 5 (0)           | 0 (0)*           | 57 (0)             | 111 (124) |
| <i>gfi</i> -pp             | 39 (nd)   | 13 (nd)         | 36 (nd)*         | 12 (nd)            | 83 (nd)   |
| <i>cxcr4b</i> -hab         | 85 (86)   | 13 (12)**       | 2 (2)**          | 0 (0)              | 53 (50)   |
| <i>zic2a</i> -hab          | 100 (100) | 0 (0)**         | 0 (0)**          | 0 (0)              | 15 (20)   |
| <i>lov</i> -hab            | 5 (96)    | 3 (2)           | 92 (2)           | 0 (0)              | 134 (54)  |
| <i>tag1</i> -hab           | 10 (88)   | 19 (8)          | 71 (4)           | 0 (0)              | 87 (135)  |
| <i>dex</i> -hab            | 2 (90)    | 12 (3)          | 86 (7)           | 0 (0)              | 64 (31)   |
| $\alpha$ -acet.tubulin-hab | 2 (95)    | 6 (0)           | 88 (5)           | 4 (0)              | 51 (79)   |
| DiI/DiD-IPN                | 0 (100)   | 0 (0)           | 96 (0)***        | 4 (0)              | 25 (2)    |
| <i>pitx2</i> -LPM          | 100 (nd)  | 0 (nd)          | 0 (nd)           | 0 (nd)             | 82 (nd)   |
| <i>spw</i> -LPM            | 94 (96)   | 2 (0)           | 2 (2)            | 2 (3)              | 54 (118)  |
| <i>cmlc2</i> -heart        | 84 (95)   | 0 (0)           | 16 (5)*          | 0 (0)              | 62 (64)   |
| <i>fkf2</i> -liver         | 98 (100)  | 0 (0)           | 2 (0)*           | 0 (0)              | 62 (64)   |
| <i>insulin</i> -pancreas   | 100 (100) | 0 (0)           | 0 (0)*           | 0 (0)              | 62 (64)   |

Analysis of *spw* was performed at 16s, *lft1*, *pitx2* and *cyc* was performed at 24s, *cxcr4b*, *otx5*, *gfi*, *zic2a*, *cmlc2*, *fkf2* and *insulin* at 2 days, *tag1* at 3 days and *lov*, *dex*,  $\alpha$ -acetylated tubulin and DiI/DiD at 4 days; analysis of *masterblind* siblings is shown in brackets. \*, medial expression instead of bilateral; \*\*, left instead of reversed; right instead of bilateral; \*\*\*, ventral instead of bilateral acet., acetylated; hab, habenula; IPN, interpeduncular nucleus; nd, not determined; n, number of embryos analysed; pp, parapeineal; numbers in brackets show values for *masterblind* siblings; all scores shown in column 2-5 show percentages

Table S2. Embryos treated with LiCl show stage dependent disruption of lateralised Nodal pathway gene expression

| <u>stage/marker</u>   | <u>wt (left)</u> | <u>reversed (right)</u> | <u>bilateral</u> | <u>not visible</u> | <u>n</u> |
|-----------------------|------------------|-------------------------|------------------|--------------------|----------|
| <b>LiCl-80%</b>       |                  |                         |                  |                    |          |
| <i>lft1</i>           | 67               | 2                       | 31               | 0                  | 67       |
| <i>pitx2</i> (in LPM) | 80 (100)         | 2 (0)                   | 18 (0)           | 0 (0)              | 137(52)  |
| <i>otx5</i>           | 30               | 7                       | 4*               | 59                 | 111      |
| <i>lov</i>            | 89               | 8                       | 3                | 0                  | 172      |
| <b>LiCl-90%</b>       |                  |                         |                  |                    |          |
| <i>lft1</i>           | 91               | 0                       | 3                | 6                  | 34       |
| <i>pitx2</i> (in LPM) | 88 (91)          | 5 (8)                   | 7 (1)            | 0 (0)              | 86 (89)  |
| <i>otx5</i>           | 78               | 5                       | 2*               | 15                 | 81       |
| <i>lov</i>            | 94               | 6                       | 0                | 0                  | 32       |
| <b>LiCl-tb</b>        |                  |                         |                  |                    |          |
| <i>lft1</i>           | 95               | 3                       | 2                | 0                  | 58       |
| <i>pitx2</i> (in LPM) | 90 (100)         | 5 (0)                   | 5 (0)            | 0 (0)              | 38 (40)  |
| <i>otx5</i>           | 94               | 4                       | 0                | 2                  | 49       |
| <i>lov</i>            | 94               | 6                       | 0                | 0                  | 33       |
| <b>LiCl-12s</b>       |                  |                         |                  |                    |          |
| <i>lft1</i>           | 69               | 16                      | 15               | 0                  | 67       |
| <i>pitx2</i> (in LPM) | 64 (nd)          | 13 (nd)                 | 23 (nd)          | 0 (nd)             | 31 (nd)  |
| <i>otx5</i>           | 66               | 19                      | 0*               | 15                 | 90       |
| <i>lov</i>            | 82               | 13                      | 5                | 0                  | 93       |
| <b>LiCl-14s</b>       |                  |                         |                  |                    |          |
| <i>lft1</i>           | 51               | 20                      | 29               | 0                  | 99       |
| <i>pitx2</i> (in LPM) | 50 (67)          | 12 (20)                 | 38 (13)          | 0 (0)              | 72 (64)  |
| <i>otx5</i>           | 68               | 19                      | 1*               | 12                 | 131      |
| <i>lov</i>            | 63               | 32                      | 5                | 0                  | 85       |
| <b>LiCl-18s</b>       |                  |                         |                  |                    |          |
| <i>lft1</i>           | 94               | 1                       | 5                | 0                  | 108      |
| <i>pitx2</i> (in LPM) | 96 (100)         | 1 (0)                   | 3 (0)            | 0 (0)              | 67 (49)  |
| <i>otx5</i>           | 92               | 3                       | 0*               | 8                  | 149      |
| <i>lov</i>            | 78               | 17                      | 5                | 0                  | 218      |
| <b>LiCl-22s</b>       |                  |                         |                  |                    |          |
| <i>lft1</i>           | 84               | 3                       | 13               | 0                  | 46       |
| <i>pitx2</i> (in LPM) | 89 (100)         | 0 (0)                   | 11 (0)           | 0 (0)              | 37 (27)  |
| <i>otx5</i>           | 92               | 5                       | 0*               | 3                  | 60       |
| <i>lov</i>            | 85               | 14                      | 1                | 0                  | 94       |
| <b>LiCl-26hpf</b>     |                  |                         |                  |                    |          |
| <i>otx5</i>           | 99               | 0                       | 1*               | 0                  | 78       |
| <i>lov</i> (30hpf)    | 95 (96)          | 5 (0)                   | 0 (4)            | 0 (0)              | 38 (44)  |
| <b>LiCl-36hpf</b>     |                  |                         |                  |                    |          |
| <i>otx5</i>           | 100              | 0                       | 0*               | 0                  | 28       |
| <i>lov</i>            | 100              | 0                       | 0                | 0                  | 40       |

Embryos were treated with LiCl for 20 min (15 min when earlier than tailbud stage) and fixed at 24s (*lft1*, *pitx2*), 2,5 days (*otx5*) and 4 days (*lov*). \*, medial expression instead of bilateral; n, number of embryos scored; nd, not determined  
all scores in column 2-5 show percentages

TableS3: Inhibition of GSK-3 $\beta$  with LiCl at 14s results in loss of nodal gene asymmetry

| <u>marker</u>            | <u>wt</u> | <u>reversed</u> | <u>bilateral</u> | <u>not visible</u> | <u>n</u> |
|--------------------------|-----------|-----------------|------------------|--------------------|----------|
| <i>lft1</i> -brain       | 51        | 20              | 29               | 0                  | 99       |
| <i>pitx2</i> -brain      | 50        | 12              | 38               | 0                  | 72       |
| <i>otx5</i> -pp          | 77        | 22              | 0*               | 1                  | 115      |
| <i>lov</i> -habenula     | 63        | 32              | 5**              | 0                  | 85       |
| <i>pitx2</i> -LPM        | 67        | 20              | 13               | 0                  | 64       |
| <i>cmlc2</i> -heart      | 70        | 18              | 12*              | 0                  | 89       |
| <i>fk2</i> -liver        | 62        | 25              | 13*              | 0                  | 89       |
| <i>insulin</i> -pancreas | 62        | 21              | 17*              | 0                  | 89       |

Wild-type embryos were LiCl treated at 14s stage for 20 min

All embryos were analysed at 24s (*lft1*, *pitx2*), 2,5 days (*otx5*, *cmlc2*, *fk2*, *insulin*) and 4 days (*lov*).

\*, medial expression instead of bilateral;\*\*, bilateral right instead of bilateral; n, number of embryos analysed; pp, parapineal; all scores in column 2-5 show percentages

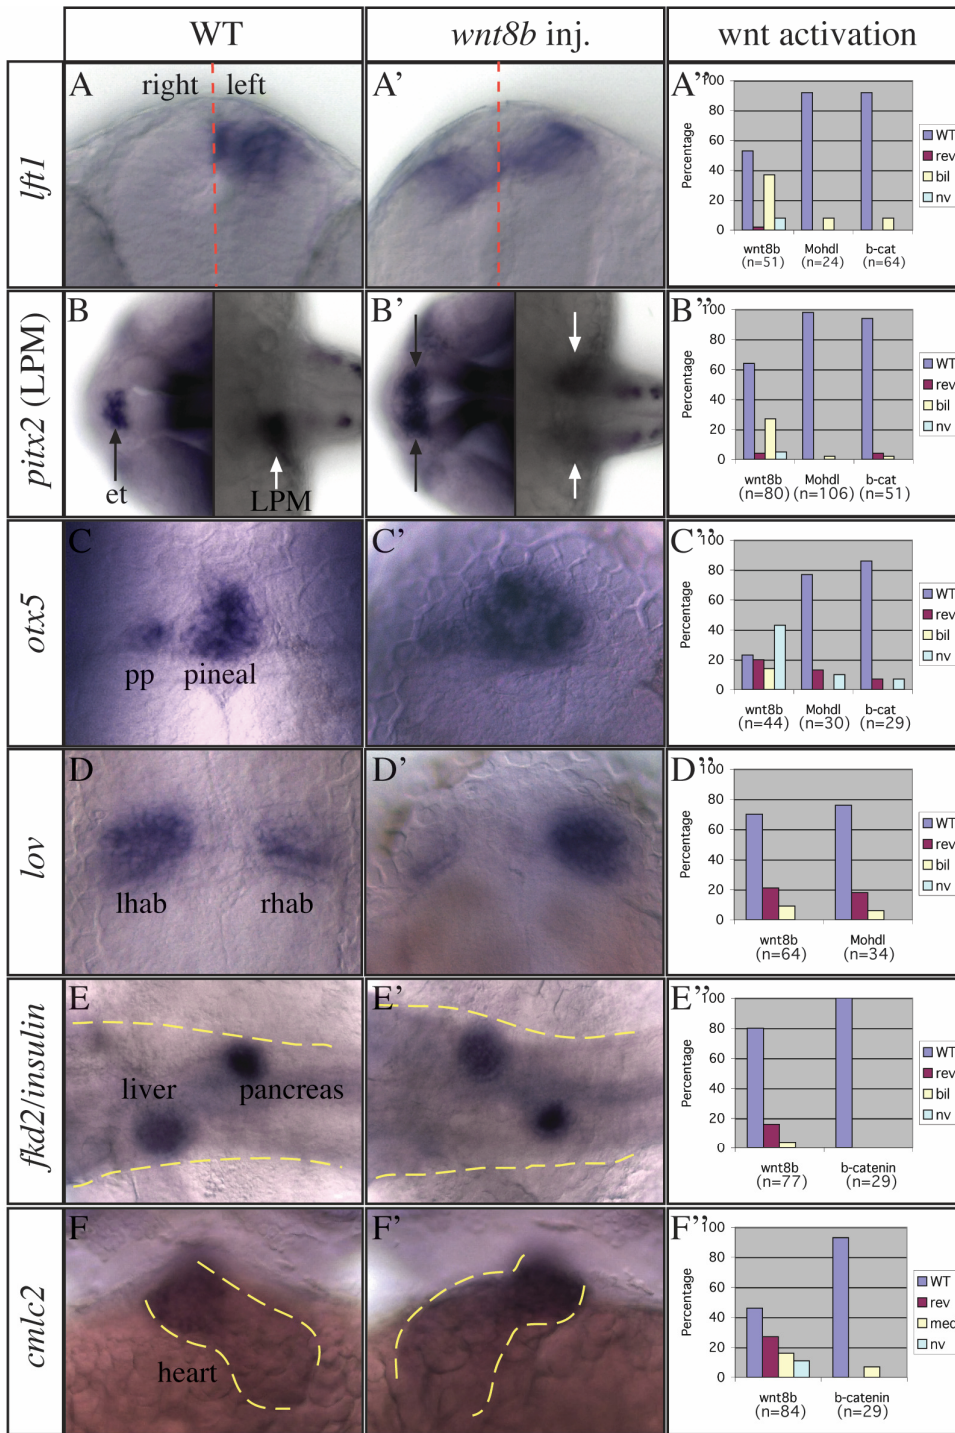

Carl et al., Supplementary Fig. 1

DiI/DiD labelling in medaka

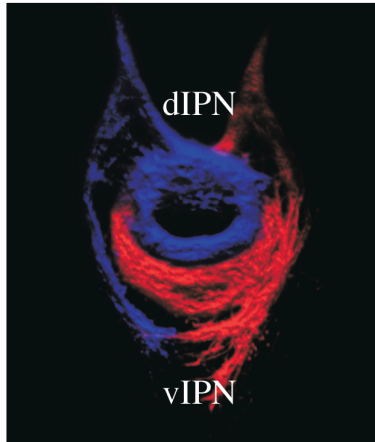

Carl et al., Supplementary Fig. 2

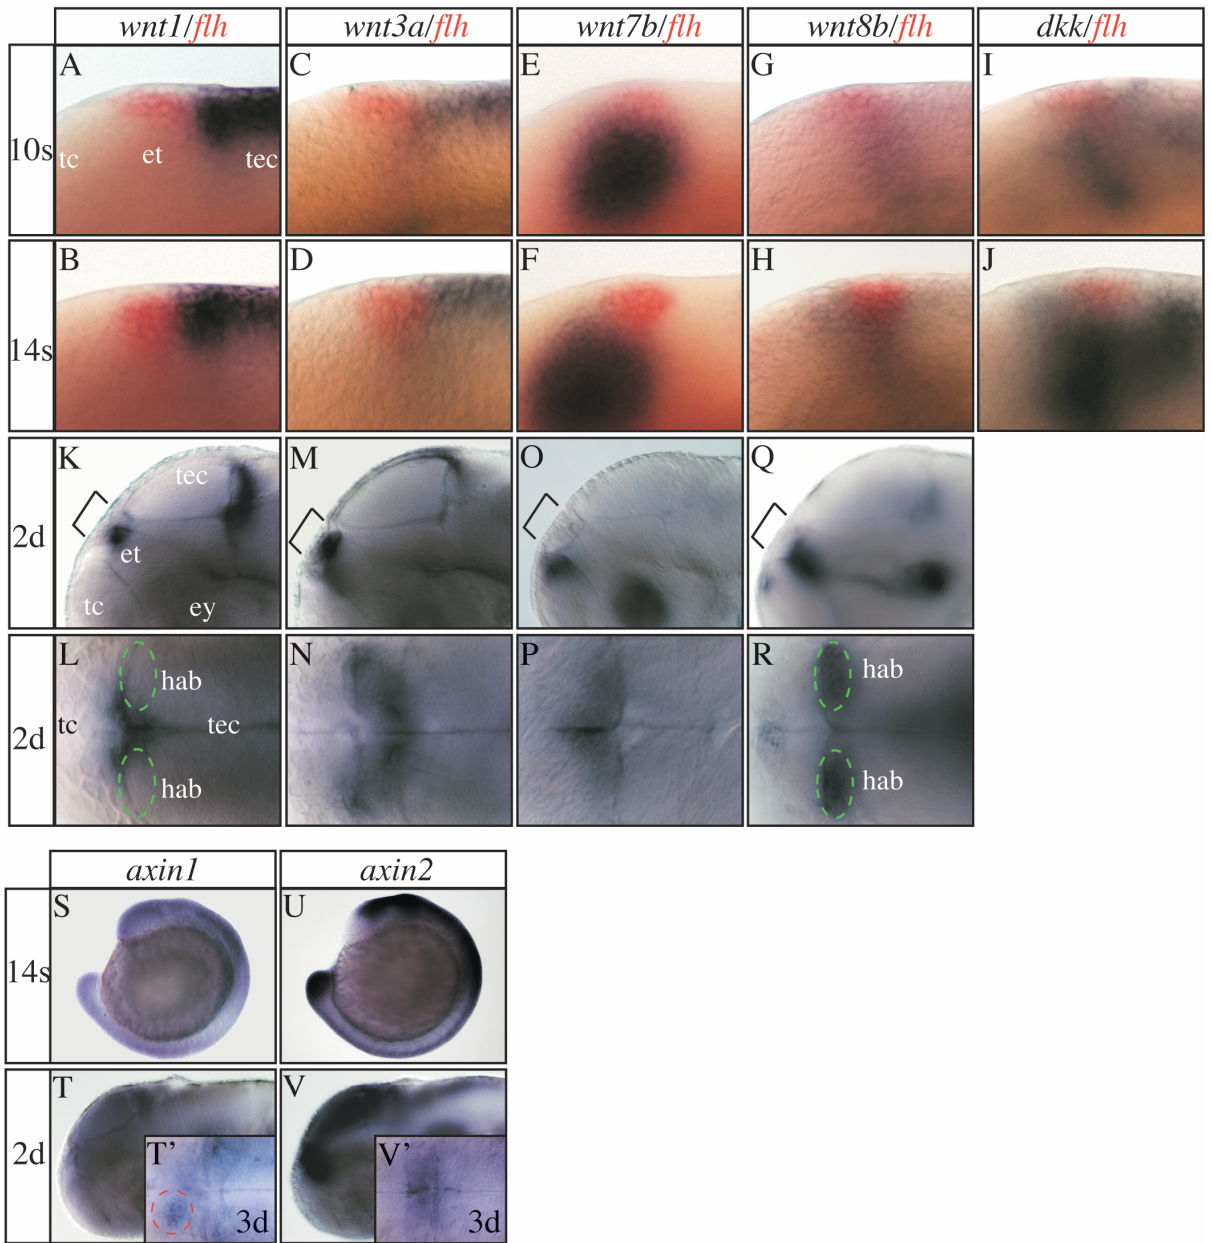

Carl et al., Supplementary Fig. 3

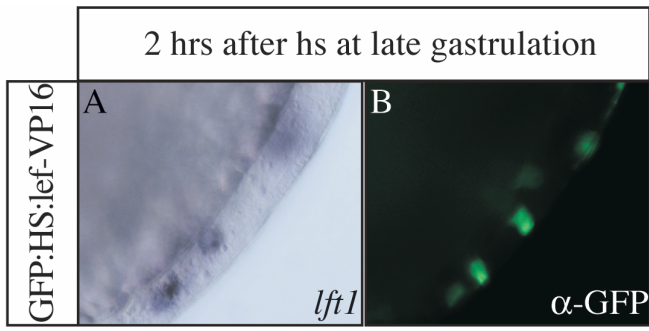

Carl et al., Supplementary Fig. 4
